# Supplementary material
Source: PubMed Central journal article supplement (PMC7196281)

# Supplementary Fig 1

A

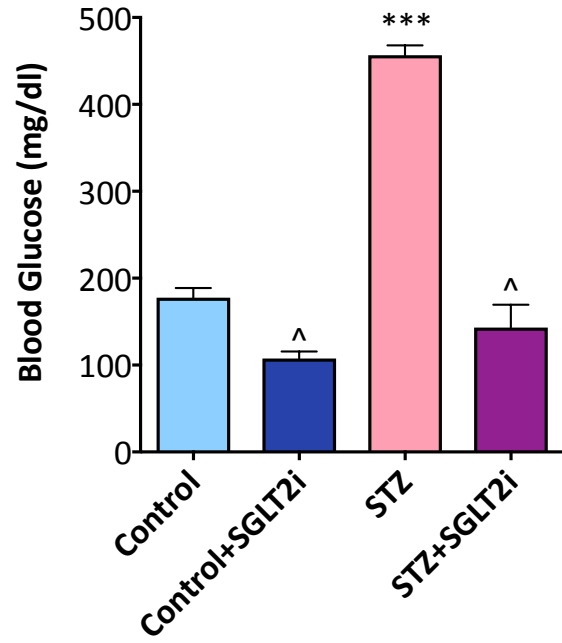

B

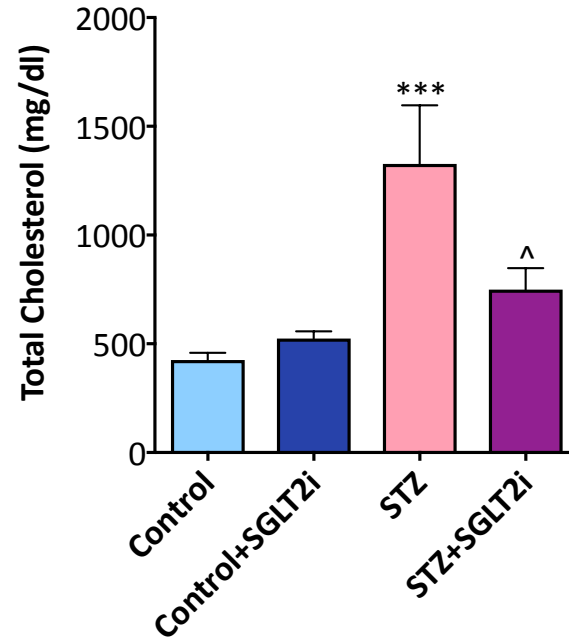

C

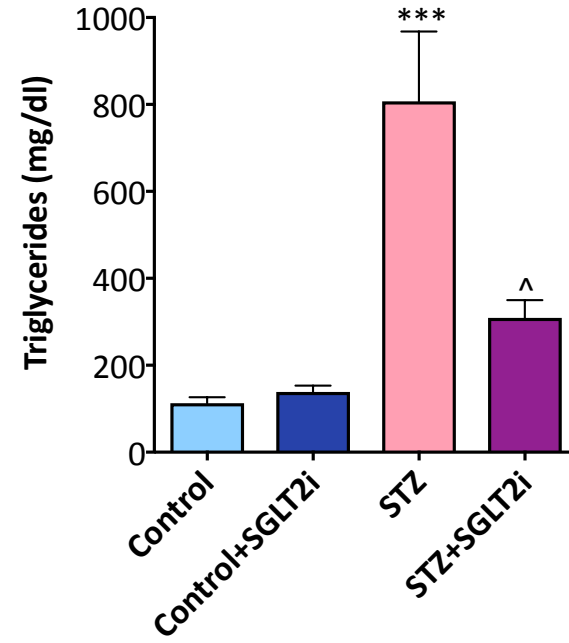

Supplement: NIHMS949842-supplement-1.pdf [file NIHMS949842-supplement-1.pdf]
